# Supplementary material
Source: publisher site journal article supplement (https://www.spandidos-publications.com/4903/downloadSupplementary)

Figure S1. Mutations in the SHP2/PTPN11 gene in lung cancer. (A) lung adenocarcinoma, (B) lung squamous cell carcinoma, (C) small cell lung cancer and (D) non-small cell lung cancer. SHP2, Src homology-2 domain-containing protein tyrosine phosphatase; PTPN11, PTP non-receptor type 11.

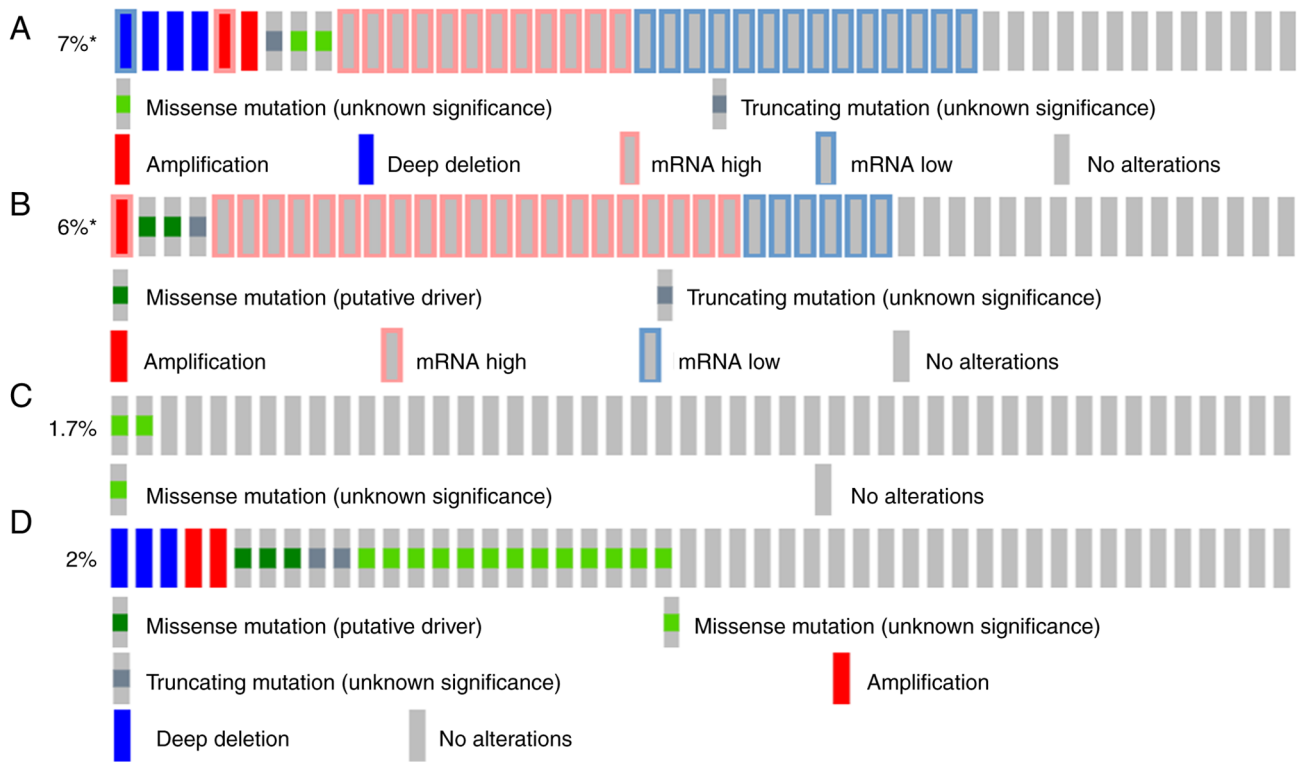

Supplement: Supplementary file 1 [file downloadSupplementary]
